# Supplementary material for: Forty Years of Erratic Insecticide Resistance Evolution in the Mosquito Culex pipiens
Source: PLOS journal article supplement (doi:10.1371/journal.pgen.0030205), 2007-11-13
Supplement: S1 (10.1371/journal.pgen.0030205.s001) [file journal.pgen.0030205.s001]

**a)**

**b)**

**c)**
